# Supplementary material for: Comparing methods of analysis in pupillometry: application to the assessment of listening effort in hearing-impaired patients
Source: PubMed Central journal article supplement — Heliyon. 2022 Jun 3;8(6):e09631. doi: 10.1016/j.heliyon.2022.e09631 (PMC9207619; doi:10.1016/j.heliyon.2022.e09631), 2022-06-03
Supplement: mmc1.pdf [file mmc1.pdf]

**Comparing methods of analysis in pupillometry: application to the  
assessment of listening effort in hearing-impaired patients.**

**Authors:** *L. Seropian<sup>1</sup>, M. Ferschneider<sup>1,2</sup>, F. Cholvy<sup>1,2</sup>, , C. Micheyl<sup>1,3</sup>, A. Bidet-Caulet<sup>1</sup>, A. Moulin<sup>1</sup>*

**Affiliations:** *1. Lyon Neuroscience Research Center (CRNL), INSERM UMRS 1028, CNRS UMR 5292, Université Claude Bernard Lyon 1, Université de Lyon, Lyon, France, 2. Audition Conseil, Lyon, France, 3. Starkey France.*

**Corresponding author :**

Annie MOULIN

Address : Centre de Recherche en Neurosciences de Lyon

INSERM U1028, CNRS UMR 5292, Université de Lyon1

Equipe PAM

Centre Hospitalier Le Vinatier

Bâtiment 452 B

95 Boulevard Pinel

69675 Bron CEDEX

FRANCE

Telephone number : +33 (0)4 72 13 89 00

E-mail address: [annie.moulin@cnrs.fr](mailto:annie.moulin@cnrs.fr)

## SUPPLEMENTARY DATA

**Figure S1**

*Group pupil dilation in the Quiet condition according to different normalization methods and baseline periods: correct trials only and 500ms baseline periods*

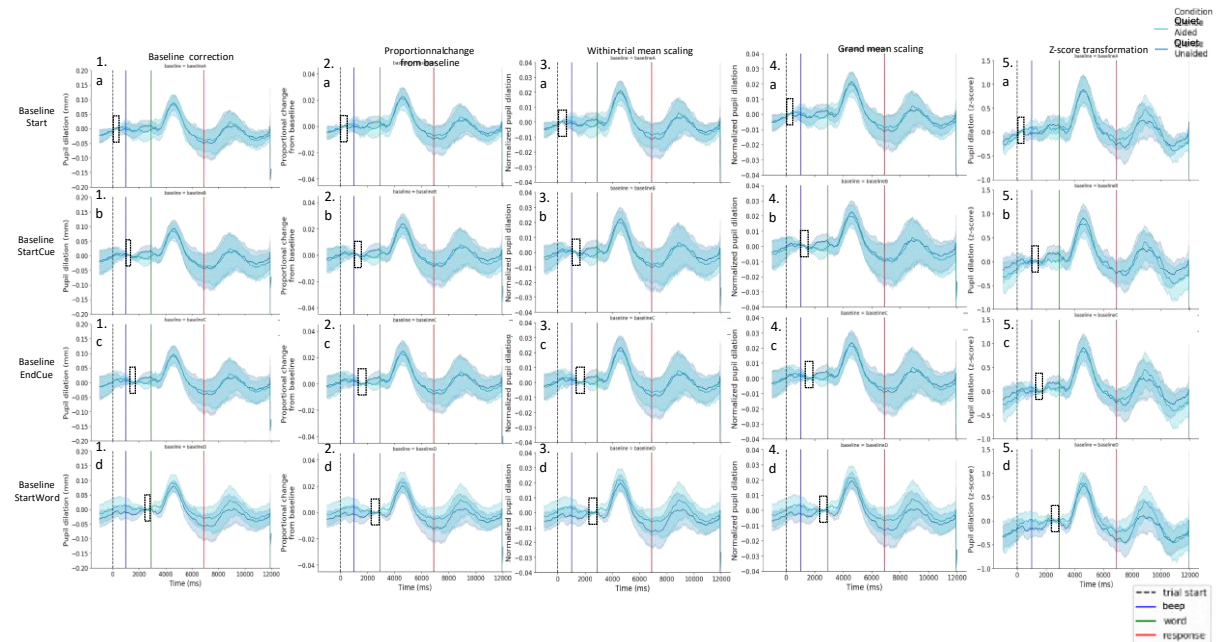

Pupil traces obtained by averaging the correctly answered trials of the 10 last trials of each block (the 2 first trials are excluded) in the Quiet conditions (N=20). Light blue traces were obtained in the Quiet Aided condition, dark blue traces were obtained in the Quiet Unaided condition. Traces were computed using several normalization methods (1: baseline correction only, 2: proportional change from baseline, 3: within-trial mean scaling, 4: grand mean scaling, 5: z-score transformation) and several baseline periods (dashed rectangles) (a: *Start*: from start (dashed black line) to the auditory cue before word presentation (blue line), b: *StartCue*: starting at the beginning of the auditory cue before word presentation (blue line), c: *EndCue*: starting at the end of the auditory cue before word presentation, d: *StartWord*: ending at the beginning of the word (green line)) with a 500ms baseline duration. Shaded areas represent 95% confidence intervals.

according to different normalization methods and baseline

## Figure S2

Group pupil dilation in the Noise condition periods:

correct trials only and 500ms baseline periods

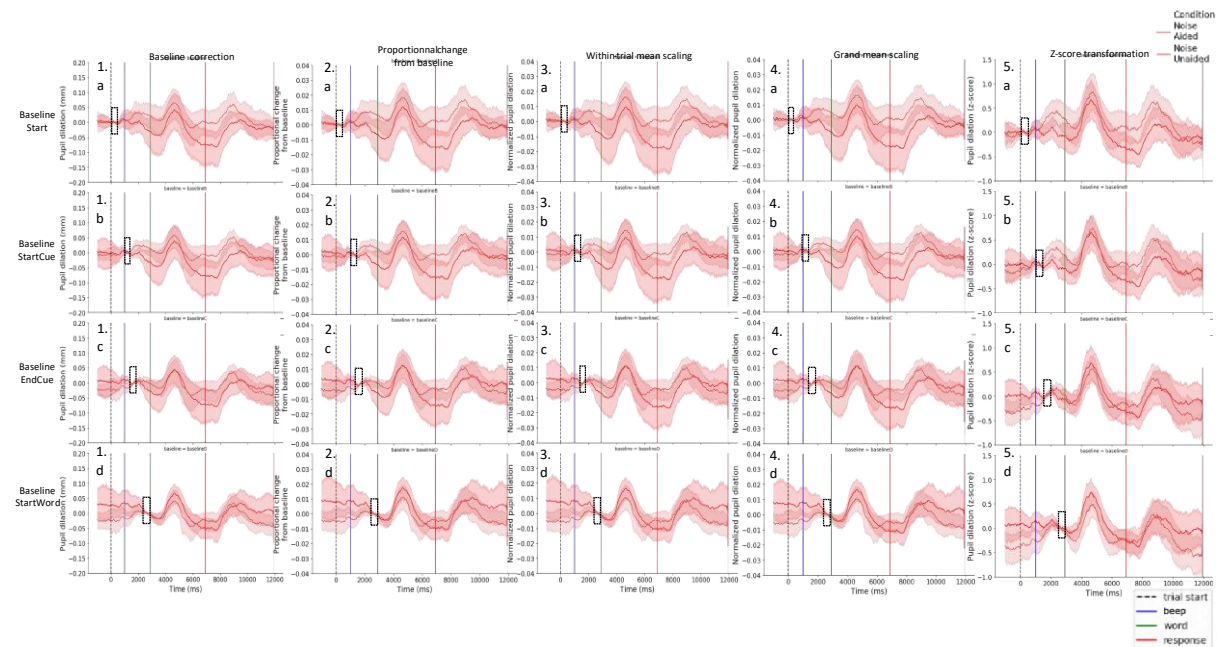

Pupil traces obtained by averaging the correctly answered trials of the 10 last trials of each block (the 2 first trials are excluded) in the Noise conditions (N=20). Light red traces were obtained in the Noise Aided condition, dark red traces were obtained in the Noise Unaided condition. Traces were computed using several normalization methods (1: baseline correction only, 2: proportional change from baseline, 3: within-trial mean scaling, 4: grand mean scaling, 5: z-score transformation) and several baseline periods (dashed rectangles) (a: *Start*: from start (dashed black line) to the auditory cue before word presentation (blue line), b: *StartCue*: starting at the beginning of the auditory cue before word presentation (blue line), c: *EndCue*: starting at the end of the auditory cue before word presentation, d: *StartWord*: ending at the beginning of the word (green line)) with a 500ms baseline duration. Shaded areas represent 95% confidence intervals.

**Figure S3**

*Group pupil dilation in the Quiet condition according to different normalization methods and baseline periods: all trials and 500ms baseline periods*

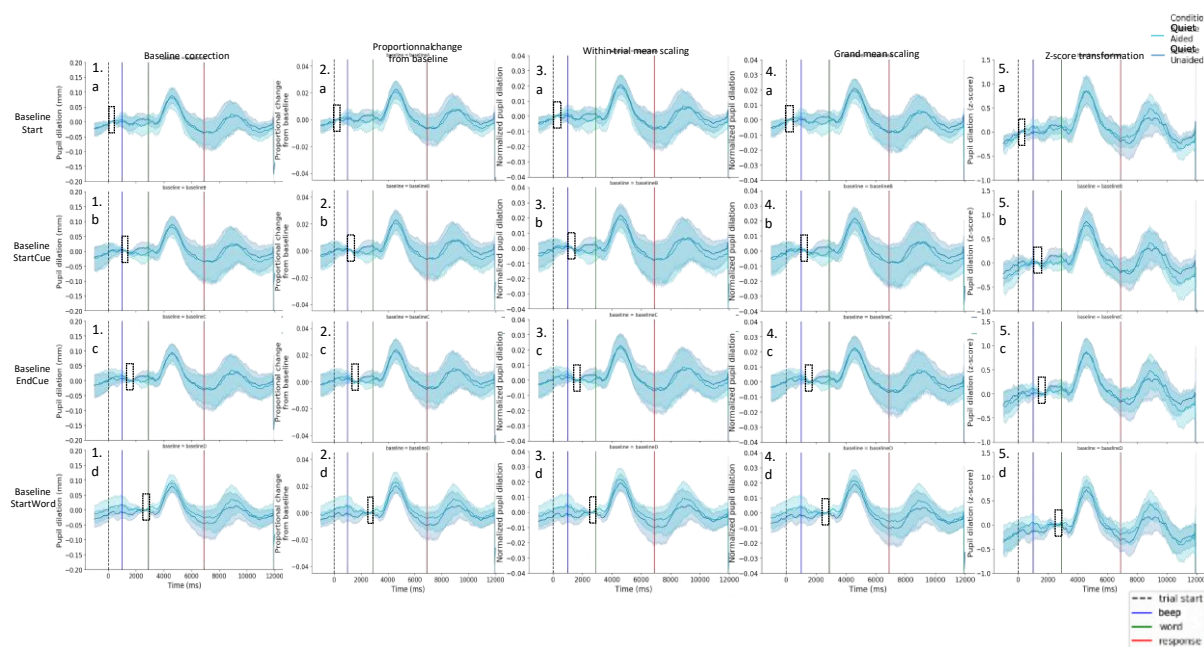

Pupil traces obtained by averaging the last 10 trials of each block (the 2 first trials are excluded) in the Quiet conditions (N=20). Light blue traces were obtained in the Quiet Aided condition, dark blue traces were obtained in the Quiet Unaided condition. Traces were computed using several normalization methods (1: baseline correction only, 2: proportional change from baseline, 3: within-trial mean scaling, 4: grand mean scaling, 5: z-score transformation) and several baseline periods (dashed rectangles) (a: *Start*: from start (dashed black line) to the auditory cue before word presentation (blue line), b: *StartCue*: starting at the beginning of the auditory cue before word presentation (blue line), c: *EndCue*: starting at the end of the auditory cue before word presentation, d: *StartWord*: ending at the beginning of the word (green line)) with a 500ms baseline duration. Shaded areas represent 95% confidence intervals.

according to different normalization methods and baseline

## Figure S4

Group pupil dilation in the Noise condition

periods: all trials and 500ms baseline periods

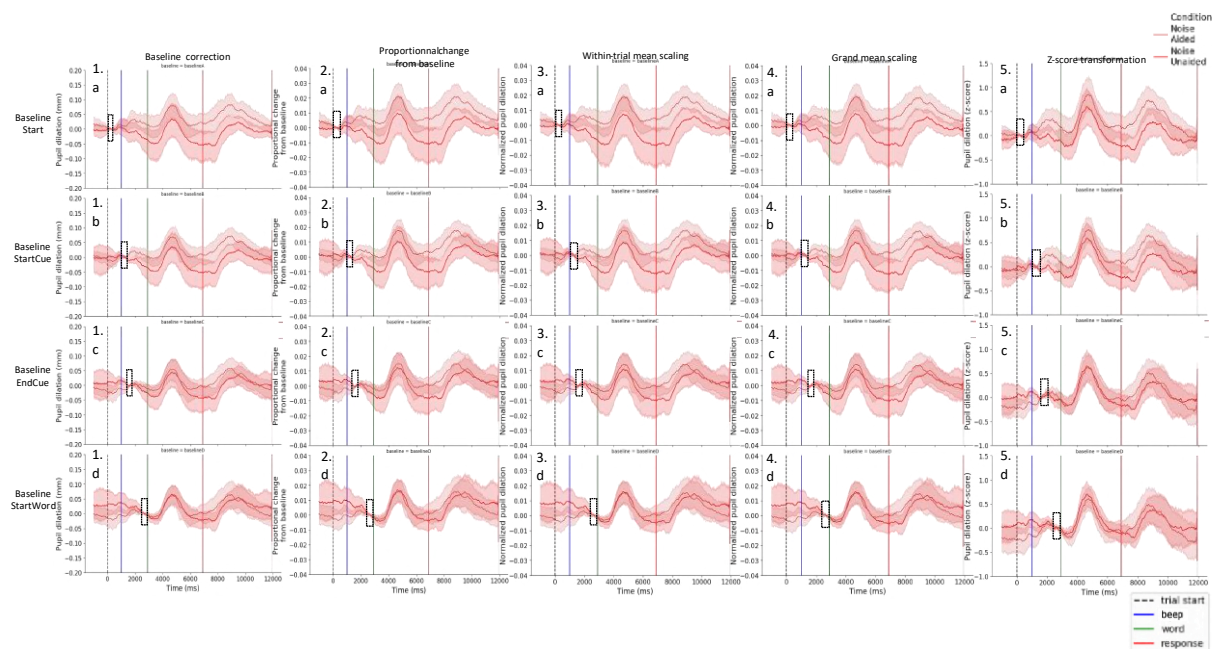

Pupil traces obtained by averaging the last 10 trials of each block (the 2 first trials are excluded) in the Noise conditions (N=20). Light red traces were obtained in the Noise Aided condition, dark red traces were obtained in the Noise Unaided condition. Traces were computed using several normalization methods (1: baseline correction only, 2: proportional change from baseline, 3: within-trial mean scaling, 4: grand mean scaling, 5: z-score transformation) and several baseline periods (dashed rectangles) (a: *Start*: from start (dashed black line) to the auditory cue before word presentation (blue line), b: *StartCue*: starting at the beginning of the auditory cue before word presentation (blue line), c: *EndCue*: starting at the end of the auditory cue before word presentation, d: *StartWord*: ending at the beginning of the word (green line)) with a 500ms baseline duration. Shaded areas represent 95% confidence intervals.

Figure S5

Group pupil dilation in the Quiet condition according to different normalization methods and baseline periods: all trials and 1000ms baseline periods

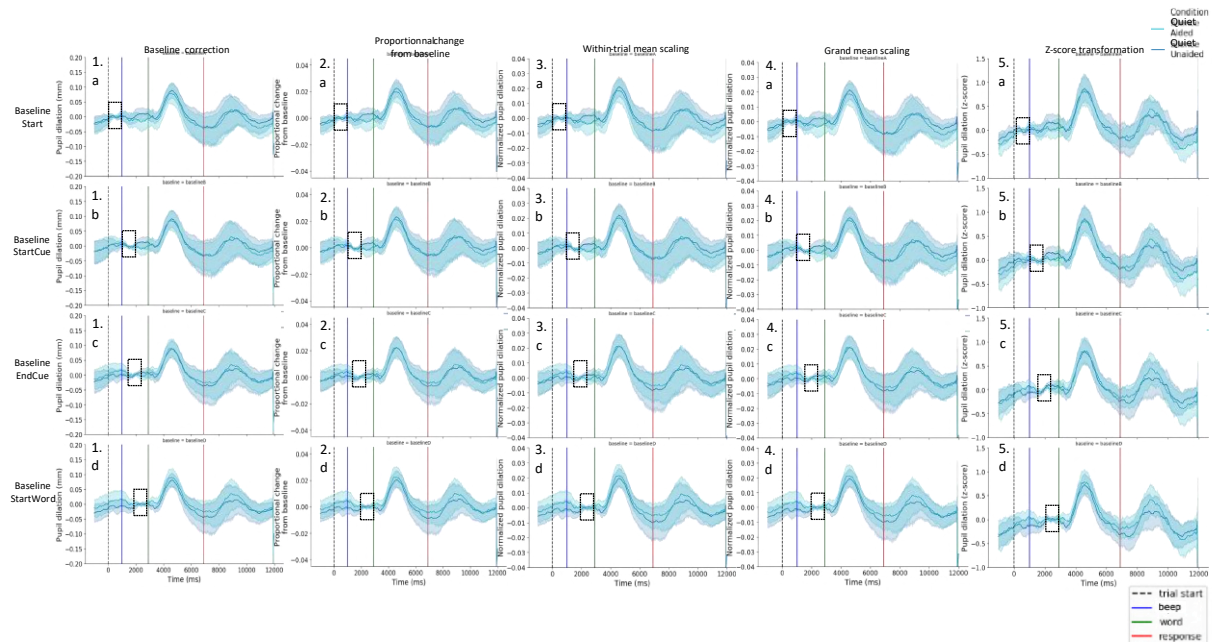

Pupil traces obtained by averaging the last 10 trials of each block (the 2 first trials are excluded) in the Quiet conditions (N=20). Light blue traces were obtained in the Quiet Aided condition, dark blue traces were obtained in the Quiet Unaided condition. Traces were computed using several normalization methods (1: baseline correction only, 2: proportional change from baseline, 3: within-trial mean scaling, 4: grand mean scaling, 5: z-score transformation) and several baseline periods (dashed rectangles) (a: *Start*: from start (dashed black line) to the auditory cue before word presentation (blue line), b: *StartCue*: starting at the beginning of the auditory cue before word presentation (blue line), c: *EndCue*: starting at the end of the auditory cue before word presentation, d: *StartWord*: ending at the beginning of the word (green line)) with a 1000ms baseline duration. Shaded areas represent 95% confidence intervals.

according to different normalization methods and baseline

**Figure S6**

*Group pupil dilation in the Noise condition*

*periods: all trials and 1000ms baseline periods*

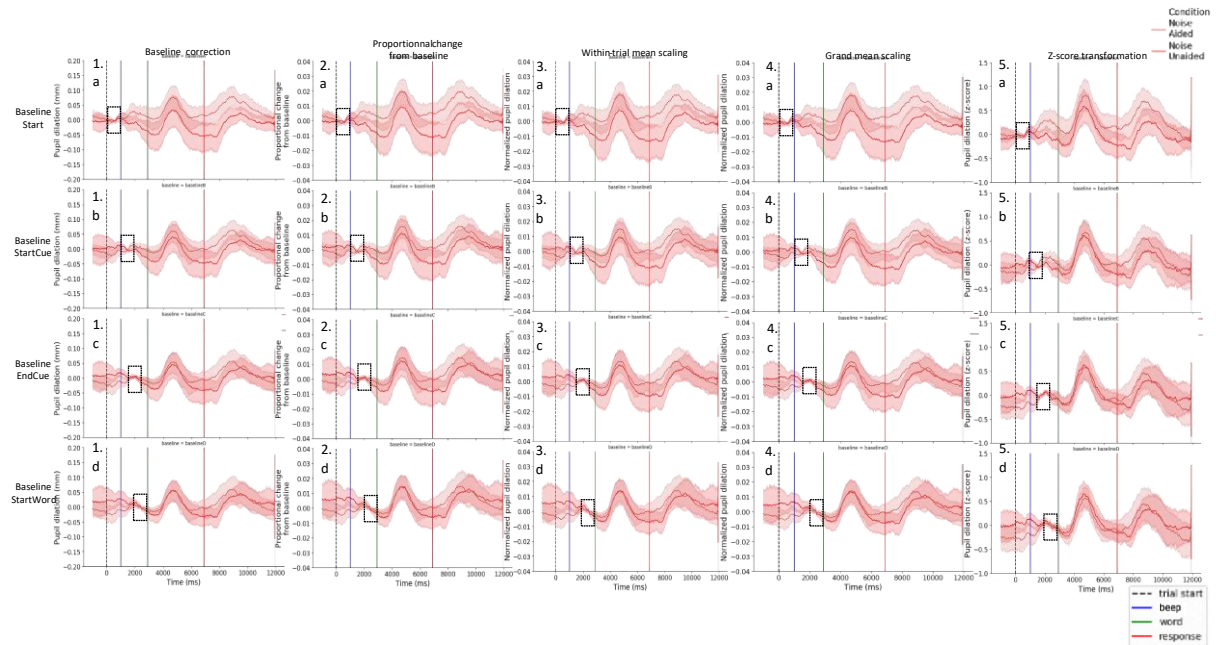

Pupil traces obtained by averaging the last 10 trials of each block (the 2 first trials are excluded) in the Noise conditions (N=20). Light red traces were obtained in the Noise Aided condition, dark red traces were obtained in the Noise Unaided condition. Traces were computed using several normalization methods (1: baseline correction only, 2: proportional change from baseline, 3: within-trial mean scaling, 4: grand mean scaling, 5: z-score transformation) and several baseline periods (dashed rectangles) (a: *Start*: from start (dashed black line) to the auditory cue before word presentation (blue line), b: *StartCue*: starting at the beginning of the auditory cue before word presentation (blue line), c: *EndCue*: starting at the end of the auditory cue before word presentation, d: *StartWord*: ending at the beginning of the word (green line)) with a 1000ms baseline duration. Shaded areas represent 95% confidence intervals.
